# Supplementary material
Source: publisher figshare collection journal article supplement (https://rs.figshare.com/ndownloader/files/21269427)
Supplement: Supplementary file 1 [file 21269427]

## HOWARD ROSENBROCK PhD Theses Supervised

|                     |                                                                                     |      |
|---------------------|-------------------------------------------------------------------------------------|------|
| <b>At Cambridge</b> | (at Cambridge often supervision was not for whole PhD)                              |      |
| E.J.A. Davison      | Automatic Control of High Order Systems                                             | 1963 |
| B.W. Smith          | Control Engineering Estimation Problems                                             | 1964 |
| M.A. Wesley         | Modelling of a Basic Open Hearth Furnace for Control Purposes                       | 1965 |
| S.F. Bush           | The Mathematical representation of Distributed Flow Processes for Automatic Control | 1965 |
| J.G. Ternan         | The Estimation of Parameters and Co-ordinates of Markoff Processes                  | 1965 |
| J.D. Wright         | A Mathematical Model of a Chemical Reactor                                          | 1967 |
| J.D.F. Wilkie       | A Sampled-data Technique for Process Modelling                                      | 1968 |
| G.J. Jennings       | Control of Industrial Multivariable Systems                                         | 1968 |
| A.D. McCann         | Dynamic Analysis of a Supercritical Boiler                                          | 1968 |
|                     |                                                                                     |      |
| <b>At UMIST</b>     |                                                                                     |      |
| J. H. Anderson      | The simulation and control of a power boiler                                        | 1967 |
| H. Kwan             | Studies related to the simulation and control of a 200 m.w. generating plant        | 1968 |
| Antony Rowe         | Some algebraic problems in system theory                                            | 1971 |
| Ronald S. McLeod    | The computer-aided-design of multivariable control systems                          | 1971 |
| John Ross Middleton | A mathematical model of the L.D. steelmaking process                                | 1971 |
| J. N. Hambury       | Computational problems of control with reference to the L.D. process                | 1971 |
| Peter D. McMorran   | Design of multivariable control systems                                             | 1971 |
| David James Hawkins | Techniques for the design of multivariable control systems.                         | 1972 |
| P. M. G. Lourtie    | Modelling, simulation, identification and control of a gas turbine                  | 1974 |
| M.L. Browne         | The digital simulation and multivariable control of a helicopter                    | 1975 |
| R. Whalley          | The control of marine propulsion plant                                              | 1976 |
| G.E. Taylor         | Algebraic problems of multivariable systems                                         | 1976 |
| T Koussiouris       | The application of polynomial matrices to control                                   | 1977 |

## **HOWARD HARRY ROSENBROCK Publications**

*The following items are held in the Royal Society library apart from a few items which are marked with an asterisk.*

### **Books**

"Computational Techniques for Chemical Engineers", 1966 (Pergamon), (with C. Storey).

"Mathematics of Dynamical Systems", 1970 (Nelson-Wiley) (with C. Storey).

"State-space and Multivariable Theory", 1970 (Nelson-Wiley).

"Computer-aided Control System Design", 1974 (Academic Press).

"New Technology: Society, Employment and Skill", 1981 (Council for Science and Society), (Convenor of Working Party and Editor); abstracted in Tom Forester, The information technology revolution, 1985, pp.635-647 (Basil Blackwell); and in Jagdish Sheth and Abdolresla Eshghi (Editors), Global economic perspectives, 1990, pp.45-58 (South-Western Publishing Co., Cincinnati, Ohio).

"Designing human-centred technology", 1989 (Springer-Verlag); Chinese edition, 1991 (World Publishing Corporation, Beijing).

"Machines with a purpose", 1990 (Oxford University Press).

*Translations into other languages:*

U. Forster and R. Unbehauen (translators), "Mathematik Dynamiker Systeme", 1971 (R. Oldenburg Verlag).

Zhou Wen-zhong and Pan Ko-yan (translators), Chinese translation of "Computer-aided Control System Design", 1983.

"Technik-entwicklung: Gestaltung ist machbar", Arbeitsheft der IG Metall zur Humanisierung des Arbeitslebens, no.9, 1984 (Industriegewerkschaft Metall für die Bundesrepublik Deutschland). (Translation of six papers)

"Machines with a purpose", Japanese translation, 1995 (Agne Publishing).

## Articles and Reports

"An extension of the momentum theory of wind turbines," ERA Technical Report C/T 105, 1951 (Electrical Research Association).

"Wind- and gust-measuring instruments developed for a wind-power survey", Proc. IEE, 1951, vol 98, pp 438-447 (awarded a Premium), (with J.R. Tagg).

"The design and development of three new types of gust anemometer", ERA Report C/T 106, 1951 (Electrical Research Association).

"Vibration and stability problems in large wind turbines having hinged blades". ERA Report C/T 113, 1955 (Electrical Research Association). (Submitted and accepted as a thesis for Ph.D.).

"The integral-of-error-squared criterion for servo mechanisms", Proc. IEE, 1955, vol 102, Part B, pp 602-607.

"An approximate method for obtaining transient response from frequency response", Proc. IEE, 1955, vol 102, Part B, pp 744-752.

"An approximate method for finding the 'best linear servo mechanism'", Proc. IEE, 1956, vol 103, Part C, pp 260-266.

"Some graphical methods in frequency analysis", Trans. SIT, 1956, vol. 8, pp 30-42.

"An investigation of the transient response of a distillation column, Part I : solution of the equations", Trans. Inst. Chem. Engrs. 1957, vol 35, pp 347-351. (with Part II, by W. D. Armstrong and W. L. Wilkinson, awarded the Moulton Medal).

"Approximate relations between transient and frequency response", J. Brit. IRE, 1958, vol 18, pp 57-64.

"Use of digital computers in chemical engineering", Process Control and Automation, 1958, vol 5, pp 466-470.

"Calculation of the transient behaviour of distillation columns - Parts I, II, III", July, August and September, 1958 issues of British Chemical Engineering.

"Interconverting frequency and transient response", Control Engineering, 1959, pp.116-120.

"A Theorem of "dynamic conservation" for distillation", Trans. Inst. Chem. Engrs. vol 38, 1960, pp 279-287.

"An automatic method for finding the greatest or least value of a function", Computer Journal, 1960, vol 3, pp 175-184. (Awarded a premium).

"Transient behaviour of multicomponent distillation columns", Automatic and Remote Control, Proc. 1st IFAC Congress, Moscow 1960, vol 4, pp 303-311, (Butterworths), (with A. B. Tavendale, C. Storey and J. A. Cliball).

"The control of distillation columns", Trans. Inst. Chem. Engrs. 1962, vol 40, pp 35- 53.

"The gas bridge thermometer", Symposium on Developments in Techniques for Temperature Measurement, 26th April 1962, Session 1, Paper 5 (with A. B. Tavendale and M. T. Cross).

"The approach to a stable steady state far from equilibrium", Proc. Physic. Soc. 1962, vol 80, pp 962-970.

"Distinctive problems of process control", Chem. Eng. Progress, September 1962, vol 58, pp 43-50.

"The transient behaviour of distillation columns and heat exchangers: An historical and critical review", Trans. Inst. Chem. Engrs. 1962, vol 40, pp 376-384.

"A Lyapunov function with applications to some nonlinear physical systems", Automatica, 1962, vol 1, pp 31-53.

"A Lyapunov function for some naturally-occurring linear homogeneous time-dependent equations", Automatica, 1963, vol 1, pp 97-109.

"Some general implicit processes for the numerical solution of differential equations", Computer Journal, 1963, vol 5, pp 329-330.

"The stability of linear time-dependent control systems". J. Electronics and control, 1963, vol 15, pp 73-80.

"A method of investigating stability", Proc. IFAC, 1963, pp 590-592 (Butterworths). "An example of optimal adaptive control", J. Electronics and Control, 1964, vol 16, pp 557-567.

"The formulation of optimal control, with an application to large systems", Automatica, 1963, vol 1, pp 263-288.

"On the stability of second-order differential equation", J. Lond. Math. Soc. 1964, vol 39, pp 77-80.

"Some conditions for the stability of nonlinear time-dependent differential equations", J. SIAM Control, 1965, vol 2, pp 171-180.

"On the computation of the optimal temperature profile in a tubular reaction vessel", in "Computing Methods in Optimization Problems", 1964, pp 23-64, Ed. A. V. Balakrishnan and L. E. Neustadt (Academic Press) (with C. Storey).

"Transfer matrix of a linear dynamic system", Electronics Letters, 1965, vol 1, pp 95- 96.

"Further remarks on the transfer matrix of a linear dynamic system", Electronics Letters, 1965, vol 1, pp 239-240.

"Sensitivity of an eigenvalue to changes in the matrix", Electronics Letters, 1965, vol 1, pp 278-279.

"Transformation of linear plant equations", Electronics Letters, 1966, vol 2, pp 49-50.

"On the design of linear multivariable control systems", Proc. 3rd IFAC Congress, June 1966, Session 1, Paper IA.

"Real-time on-line digital computers", Proc. 3rd IFAC Congress, June 1966, (with A. J. Young).

Letter, Computer Journal, 1966, vol. 9, pp. 320&324.

"Transfer function matrices", Electronics Letters, Sept. 1966, vol 2, No 9, pp 331-332.

"Least order of system matrices", Electronics Letters, 1967, vol 3, pp 58-59.

"Transformation of linear constant system equations", Proc. IEE, 1967, vol 114, pp 541- 544.

"Connection between network theory and the theory of linear dynamical systems", Electronic Letters, 1967, vol 3, pp 296-297.

"Reduction of system matrices", Electronics Letters, 1967, vol 3, p 368. "Efficient computation of least order for a given transfer function", Electronics Letters, 1967, vol 3, pp 413-414.

"Sur les relations entre les filtres linéaires discrets et quelques formules de Gauss", in "Identification, Optimisation et Stabilité des Systems Automatiques", 1967, pp 239- 249, Ed. J. Carpentier and H. Garelly (Dunod).

"Generation of polynomial system matrices", Electronics Letters, 1967, vol 3, pp 486-487.

"On linear system theory", Proc. IEE, 1967, vol 114, pp 1353-1359, (with the earlier paper, "Transformation of linear constant system equations", awarded Heaviside Premium).

"Computation of minimal representation of a rational transfer-function matrix", Proc. IEE, 1968, vol 115, pp 325-327.

"System matrices giving positive-real transfer-function matrices", Proc. IEE, 1968, vol 115, pp 328-329.

"System matrices giving lossless positive-real transfer-function matrices", Proc. IEE, 1968, vol 115, pp 330-331.

"Relatively prime polynomial matrices", Electronics Letters, 1968, vol 4, pp 227-228.

"Generalized resultant", Electronics Letters, 1968, vol 4, pp 250-251.

"McMillan forms from system matrices", Electronics Letters, 1968, vol 4, p 374.

"Some properties of relatively prime polynomial matrices", Electronics Letters, 1968, vol 4, pp 374-375.

"Design of multivariable control systems using the inverse Nyquist array", Proc. IEE, 1969, vol 116, pp 1929-1936.

"Minimal indices in dynamical systems", Electronics Letters, 1969, vol 5, pp 658-659.

"New vector-space structure for dynamical systems", Electronics Letters, 1970, vol 6, 162-163 (with A. G. J. Macfarlane).

"State-space analysis of a cascaded controller", Proc. IEE, 1970, vol 117, pp 1026-1030 (with P. D. McMorran).

"Further properties of minimal indices", Electronics Letters, 1970, vol 6, p 450.

"Properties of linear constant systems", Proc. IEE, 1970, vol 117, pp 1717-1720.

"Allocation of poles and zeros", Proc. IEE, 1970, vol 117, pp 1879-1886 (with A. Rowe).

"Progress in the design of multivariable control systems", Trans. Inst. Measurement of Control, 1971, vol 4, pp 9-11.

"Development of recent stability criteria", Proc. IEE, 1971, vol 118, p 813 (with A. G. J. MacFarlane).

"Good, bad, or optimal?", Trans. IEEE, 1971, vol AC-16, pp 552-554 (with P. D. McMorran).

"The stability of multivariable systems", Trans. IEEE, 1972, vol AC-17, pp 105-107.

"The use of computers for designing control systems", Measurement and Control, 1972, vol.5, pp.409-412.

"Modules and the definition of state", Int. J. Control, 1972, vol 16, pp 433-435.

"Bounds for transfer functions in multivariable systems", Trans. IEEE, 1973, vol AC-18, pp.54-56.

"Multivariable circle theorems", in Recent Mathematical Developments in Control, Ed. D. J. Bell, 1973, pp 345-365 (Academic Press).

"The zeros of a system", Int. J. Control, 1973, vol 18, pp 297-299. "Order, degree and complexity", Int. J. Control, 1974, vol 19, pp 323-331.

"Contributions to a hierarchical theory of systems", Int. J. Control, 1974, vol 19, pp 845-867 (with A. C. Pugh).

"Non-minimal LCR multiports", Int. J. Control, 1974, vol 20, pp 1-16.

"Dynamical indices of a transfer function matrix", Int. J. Control, 1974, vol 20, pp 177- 189 (with G. E. Hayton).

"Structural properties of linear dynamical systems", 1974, Int. J. Control, vol 20, pp 191-202.

"Hierarchical theory of systems", 1975, in 'New Directions in Signal Processing in Communication and Control', Ed. J. K. Skwirzynski, pp.637-645 (Noordhoff-Leyden).

"Redundancy in linear, time-invariant, finite-dimensional systems", IFAC Conference on Multivariable Technological Systems, Manchester, Sept. 1974.

Comments on paper by MacFarlane, and on paper by Hughes and Mallouppa, IFAC Conference on Multivariable Technological Systems, Manchester, Sept. 1974.

"Correction to 'The zeros of a system'", Int. J. Control, 1974, vol 20, pp 525-527.

"How little do we know about systems?", (Keynote Address), Proc. Twelfth Allerton Conference on Circuit and System Theory, October 2-4, 1974.

"Recent results in large scale systems", Proc. 12th Annual Allerton Conference on Circuit and System Theory, Oct. 2-4, 1974, pp. 574-579.

"Stability and the eigenvalues of  $G(s)$ ", 1975, Int. J. Control, vol 21, pp 99-104 (with P. A. Cook).

"Comment on C. D. Johnson's paper 'State overdescription and uncontrollability of dynamical systems'", 1975, Int. J. Control, vol 21, pp 347-349.



"Computer-aided design of multivariable control systems", 1975, Proc. Conference on "How to apply advanced control in industrial automation - II - Multivariable and noninteracting systems", Purdue, April 1975; in "Multivariable Control Systems", 1975 (Control Engineering).

"The future of control", 1975, Plenary address, Sixth IFAC Congress, Boston, August, 1975; reprinted in *Automatica*, 1977, vol.13, pp.389-392.

"A comment on three papers", *Int. J. Control*, 1977, vol 25, pp 1-3.

"The transformation of strict system equivalence", *Int. J. Control*, 1977, vol 25, pp 11-19.

"Comments on the paper 'A general frequency stability criterion for multi-input-output, lumped and distributed parameter feedback systems'", *Int. J. Control*, 1977, vol 25, pp 321-322 (with P.A. Cook).

"Inverse Systems", *Int. J. Control*, 1977, vol 25, pp 389-392 (with A. J. J. van der Weiden).

"Comments on 'Poles and zeros of linear multivariable systems; a survey of the algebraic, geometric and complex-variable theory'", *Int. J. Control*, 1977, vol 26, pp 157-161.

"The general problem of pole assignment", *Int. J. Control*, 1978, vol.27, pp 837-852 (with G. E. Hayton).

"Interactive computing: a new opportunity", in "Numerical Software - Needs and Availability", 1978, Edited by D. Jacobs, pp 227-235 (Academic Press).

"Transformation of system equations", in "Recent Theoretical Developments in Control", Edited by M. J. Gregson, 1979, pp 3-8 (Academic Press).

"The inverse Nyquist array method", in "Alternatives for Linear Multivariable Control", 1978, pp. 101-137, Edited by M. K. Sain, J. L. Peczkowski and J. L. Hilsa (National Engineering Consortium, Inc., Chicago) (with N. Munro).

"The redirection of technology, IFAC Symposium on "Criteria for selecting appropriate technologies under different cultural, technical and social conditions", Bari, Italy, 21-23 May 1979.

"Standard forms, controllability and observability", Chapter 3, pp 43-52, in "Modern approaches to control system design", Edited by N. Munro, 1979 (Peter Peregrinus).

"Inverse-Nyquist-array design method", Chapter 5, pp 65-81, in "Modern approaches to control system design", Edited by N. Munro, 1979 (Peter Peregrinus).

"Automation - Economics – Employment", Finnish Engineering Days Seminar, 7-8 November, 1979.

"Human resources and technology", presented at Sixth World Congress of the International Economic Association, Mexico City, 4-8 Aug. 1980, published in Paul Streeten and Harry Maier, Editors, Human Resources, Employment and Development, vol.2, pp 345-354, 1983 (MacMillan).

"Systems and polynomial matrices", in "Geometrical Methods for the Theory of Linear Systems", Edited by C. I. Byrnes and C. F. Martin, 1980, pp 233-255 (D. Reidel Publishing Co.).

"Automation and society", Systems and Control Letters, 1981, vol. 1, pp 2-6.

"Automation and society", in D. Hinrichsen and A Isidori (Editors), Feedback Control of Linear and Nonlinear Systems, Proc. Joint Workshop, Bielefeld/Rome, June 22- July 3, 1981, pp. 215-226. (Springer-Verlag).

"Engineers and the work that people do," IEEE Control Systems Magazine, 1981, vol.1, pp 4-8; reprinted in IEEE Technology and Society, 1981; and as Occasional Paper No.21, Work Research Unit, London, and in Personnel Management Review, Shell Co., No.52, Dec 1981-March 1982; and in Review, Journal of the Society of Post Office Executives, vol.12, no.2, Feb.1983, pp 36-38; and in "Organizations: concepts, issues, cases", 1983, Open University Reader (Harper and Row); and in Education and Industry, 1983, No.16, pp 3-10 (Wigan Standing Conference on Education and Industry), and in The Experience of Work, pp. 161-171, edited by Craig R. Littler, November 1984, (Heinemann Educational Books); reprinted in Zenon W. Pylshyn and Liam J. Bannon, Editors, 1989, Perspectives on the computer revolution, pp.519-528 (Ablex); reprinted in translation Ny Teknik, (Stockholm), 25 Oct. 1984, pp 24-25; reprinted in Armson and Paton (eds), Organization; cases, issues, concepts, 1994 (Paul Chapman); and in J. Applied Manufacturing Systems, vol.7, No.1, 1994, pp.77-82.

Robots and people", Fourth Hartley Lecture, Measurement and Control, 1982, vol.15, pp 105-112; reprinted in Work and People (Australian Dept. of Education and Industrial Relations) vol.9, No.2, Aug. 1983; and in "Living with technology", 1983, Open University; and in Work and People, 1983, vol.9, No.2, pp 14-18 (Dept. of Employment and Industrial relations); and in Trade Union and the computer, (Institut für berufsbezogene Erwachsenerbildung).

"Computers, doctors, patients and the 80s", 1980, in Computers and the General Practitioner, Edited by A. Malcolm and J. Poyser, 1982, pp 105-108 (Pergamon Press).

"Technology policy and options", presented at EEC FAST Conference on The Information Society: the distribution of benefits and risks associated with microelectronic applications, 25-29 Jan, 1982, London.

"Systems and polynomial matrices", and "Composite systems", pp. 713-714, and "Pole assignment", pp. 3720-3721, and "The inverse Nyquist array design method", pp. 2584-2588, in Madan Singh, editor, Systems and Control Encyclopedia, 1984, (Pergamon Press); the first two of these also in D.P.Atherton and P.Borne, Concise Encyclopedia of Modelling and Simulation, 1992 (Pergamon Press).

"Seeking an appropriate technology", presented at IFAC Symposium on Systems Approach to Appropriate Technology Transfer, Vienna, 21-23 March 1983.

"Social and engineering design of an FMS", presented at CAPE 83, 25-28 April 1983, Amsterdam, published in "Computer applications in production and engineering CAPE 83", edited by E. A. Warman, 1983, pp 191-196 (North-Holland).

"Proposal for a new design of wind power generator", Wind Engineering, 1983, Vol.7, pp 60-63.

"Engineers, robots and people", Chemistry and Industry, Oct. 1982, pp 756-759.

"Designing automated systems - need skill be lost?", Section X, BAAS Annual Conference, 22-26 Aug.1983, Brighton; reprinted in Science and Public Policy, Dec. 1983, pp. 274-277; and in Trends in Analytical Chemistry, 1984, vol.3, pp 1-5; and in Pauline Marstrand (editor), New Technology and the future of Work and Skills, 1984 (Frances Pinter).

"Developing a technology which provides satisfactory work", IFAC International Research Symposium New Technology and Ergonomics, 31 May - 2 June 1983, Valenciennes; reprinted in IFAC Newsletter, 1983, No. 5, Oct., p.1., and in QWL Focus, vol.4, Spring 1984 (Ontario Quality of Working Life Centre).

\*"Can human skill survive microelectronics?", Conference paper, 1984 (Forschungsinstitut für Mikroprozessortechnik); also in Ed Rhodes and David Wield (editors), Implementing New Technologies: Innovation and the Management of Technology, 1993, 1994, pp.303-307 (NCC/Blackwell).

\*"A new Industrial Revolution?", in Tom Forester (editor), The Information Technology Revolution, 1985, pp.635-647 (MIT Press); also in J.N.Sheth and Abdelreza Eshgi (editors), The Global Macroeconomics Perspectives, 1989 (Southwestern Publishing Co.).

"A variational principle for quantum mechanics", Phys. Lett. A, 110 (1985) pp 343-346.

"On wave/particle duality", Phys. Lett. A, 114 (1986) pp 1-2.

"Three approaches to quantum mechanics", Phys. Lett. A 114 (1986) pp 63-64.

"The quantum-mechanical probability density", Phys. Lett. A 116 (1986) pp.410-412.

"Deskilling or job enrichment", BCS Seminar on Social Implications of Expert Systems and Artificial Intelligence, Cosenor's House, Abingdon, 30 April 1985.

"Engineering design and social science", ESRC/SPRU Workshop on New Technology in Manufacturing Industry, Cumberland Lodge, Windsor, 28-29 May 1985.

"Technology and Society", 1986 Cockcroft Lecture, delivered 9 May 1986 to Manchester Technology Association.

"Outline for a variational development of quantum mechanics," Presented at MTNS Conference, Phoenix, Arizona, 15-19 June 1987; in CJ. Byrnes, C.F. Martin and R.E. Saeks (Editors), Linear Circuits, Systems and Signal Processing, 1988, pp. 397- 402 (North-Holland).

"The combined social and technical design of production systems," presented at the International Seminar on Advanced Information Technology, Milan 28-30 October 1987.

"Engineering as an art", presented at International Conference on Culture, Language and Artificial Intelligence, Stockholm, May 30 to June 3, 1988; in Bo Goranson and Magnus Florin (Editors), Artificial intelligence, culture and language: On education and work, 1990, pp. 95-100 (Springer-Verlag); reprinted in A.I & Society, 1988, vol. 2, pp. 315-320.

"On the history of system zeros and the work of Kronecker", Proceedings 27th IEEE Conference on Decision and Control, Dec.7-9, 1988, Austin, Texas, vol.2, pp.887- 889; abstracted in Michael K. Sain and Cheryl B. Schrader, "The role of zeros in the performance of multi-input, multi-output feedback systems," IEEE Trans. on Education, vol.3, no.3, Aug.1990, pp. 244-257.

\* "Preservation of skill and design of technology", presented at RSO Conference on Joint Design of Technology, Organisation and People Growth, Venice, 12-14 October 1988.

\* "Purpose and automatic control", Computing & Control, IEE, 1992, pp.87-90.

"Science, technology and purpose", AI & Society, 1992, vol. 6, pp.3-17.

\* "Automation and the nature of work", Measurement & Control, Inst. MC, 1992, vol. 5, pp.149-151.

"Technology and its environment", in Proceedings of meeting on Ecology of Science and Technology, Tokyo, 2-4 Dec. 1992, pp.119-133 (Japan Science Foundation); also in AI & Society, 1993 vol. 7, pp. 117-126.

\* "Introductory Address, Plenary Session", in Karamjit S. Gill (Editor), New visions of the post-industrial society, SEAKE Centre, University of Brighton, 1995.

"A stochastic variational treatment of quantum mechanics", Proc. R. Soc. Lond. A (1995) vol. 450, pp. 417-437.

"A correction to a stochastic variational treatment of quantum mechanics", Proc. R. Soc. Lond. A (1997) vol. 453, pp.983-986.

"Process control: past and future", J. Proc. Control, 1996, vol. 6, pp.1-5.

"Ethics and intellectual structures", AI & Society, 1995, vol.9, pp.18-28.

"Control and the future of technology", Computers & Chemical Engineering, Supplement, 6th International Symposium on Process Systems Engineering and 30th European Symposium on Computer Aided Process Engineering, 25-29 May 1997, Trondheim, Norway, pp. S297-S304 (Pergamon).

"The definition of state in the stochastic variational treatment of quantum mechanics", Phys. Lett. A 254 (1999) pp.307-313.

"Doing quantum mechanics with control theory", IEEE Trans. AC, 2000, vol.45, No.1, pp.73-77.

\* "Dynamic programming and path integrals", Proc. 39<sup>th</sup> IEEE Conf. Dec. and Control, Sydney, Australia, December 2000.

\* "Quantum mechanics and dynamic programming", Trans. Inst. MC, vol. 30, pp. 33-46, March 2008, (with Z. Ding).
